# Supplementary material for: Gene Networks and Pathways Involved in LPS-Induced Proliferative Response of Bovine Endometrial Epithelial Cells
Source: MDPI journal article supplement (doi:10.3390/genes13122342), 2022-12-12
Supplement: s1 [file s1]

---

## Supplementary Materials

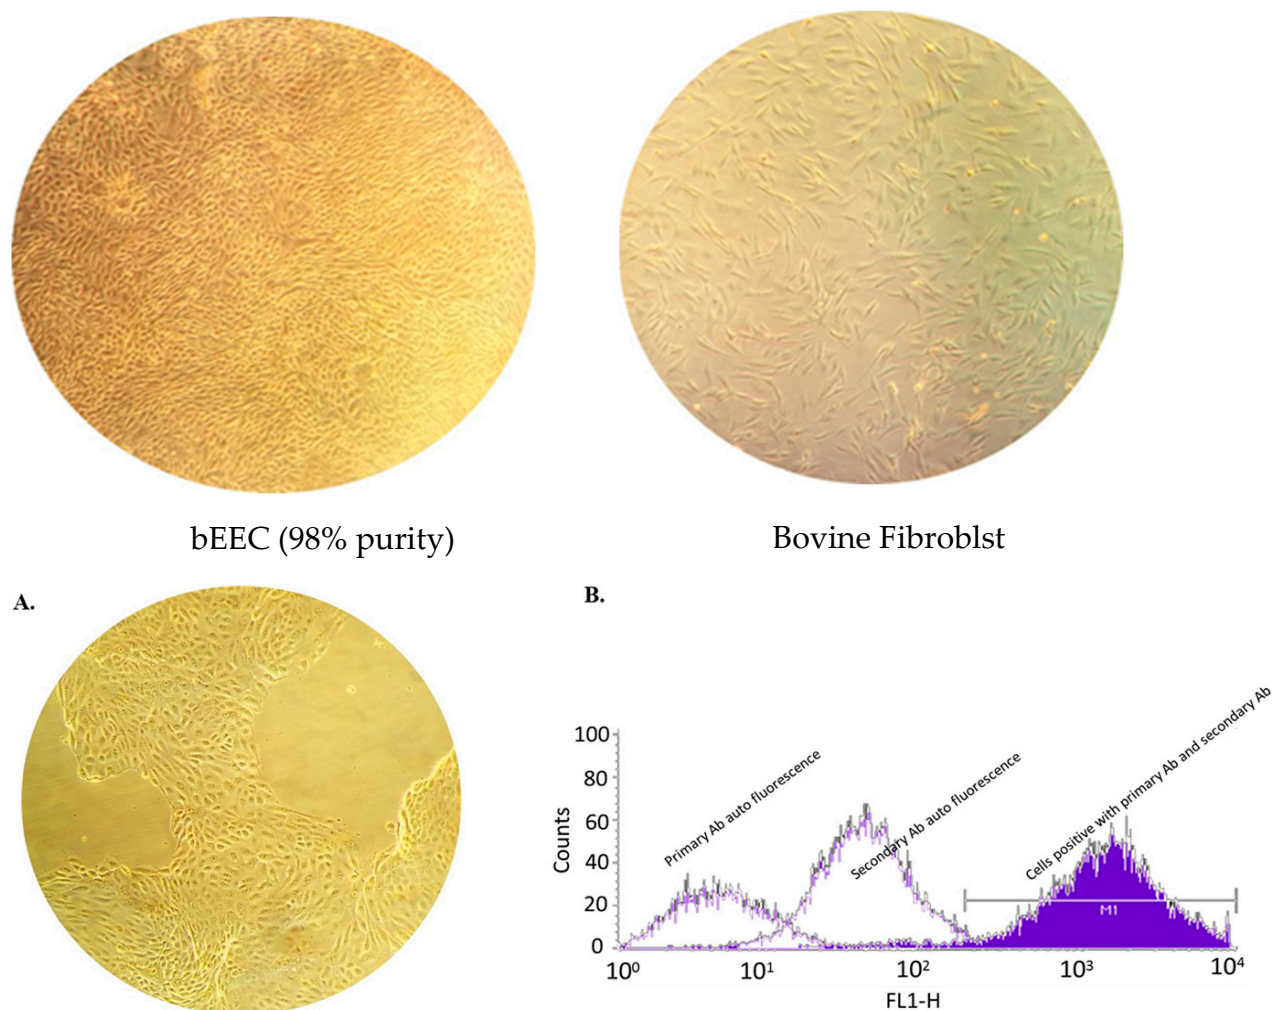

**Figure S1: Morphology and purity of bovine fibroblast and endometrial epithelial cells.** A. Cell morphology of bovine endometrial epithelial cells (bEECs) B. Representative Flow cytometric histogram of bEECs expressing the epithelial-specific cytokeratin-18 showing their appearance to the epithelial cell population. (98% of cells are in M1 region corresponding to this population) [1]. The change in cellular biology and physiology of bEECs following LPS were shown in previous work [17].

**Table S1: Summary of RNA quality and RNA-seq reads mapping to reference genome [1].**

| Samples<br>Cow | RNA<br>(RIN) | Concentration | LPS (µg/ml) | Total reads          | TrimmedReads.<br>Both Surviving | MappedReads.<br>Unique | %<br>mapped reads | Unique |
|----------------|--------------|---------------|-------------|----------------------|---------------------------------|------------------------|-------------------|--------|
|                |              | (ng/µl)       |             | (× 10 <sup>6</sup> ) | (× 10 <sup>6</sup> )            | (× 10 <sup>6</sup> )   |                   |        |
| No.1           | 10           | 1361          | T0 *        | 28.49                | 28.43                           | 26.89                  |                   | 94.58  |
|                | 10           | 1037          | C0 **       | 27.58                | 27.52                           | 25.95                  |                   | 94.29  |
|                | 9.9          | 805           | 2           | 28.16                | 28.10                           | 26.53                  |                   | 94.41  |
|                | 9.9          | 946           | 8           | 29.82                | 29.75                           | 28.03                  |                   | 94.22  |
| No.2           | 9.1          | 1018          | T0 *        | 29.99                | 29.92                           | 27.56                  |                   | 92.11  |
|                | 8.8          | 1081          | C0 **       | 30.08                | 29.98                           | 26.82                  |                   | 89.46  |
|                | 9.0          | 1450          | 2           | 29.19                | 29.12                           | 26.39                  |                   | 90.63  |
|                | 8.9          | 1417          | 8           | 28.78                | 28.71                           | 26.75                  |                   | 93.17  |
| No.3           | 10           | 1580          | T0 *        | 26.11                | 26.05                           | 24.58                  |                   | 94.36  |
|                | 9.9          | 1227          | C0 **       | 25.30                | 25.23                           | 23.81                  |                   | 94.37  |
|                | 9.8          | 1405          | 8           | 24.97                | 24.89                           | 23.28                  |                   | 93.53  |
|                | 9.8          | 1096          | 8           | 31.54                | 31.46                           | 29.63                  |                   | 94.18  |
| Average        |              |               |             | 28.33 ± 2.03         | 28.26 ± 2.03                    | 26.35 ± 1.96           |                   |        |
| Overall        |              |               |             | 340.01               | 339.16                          | 316.21                 |                   |        |

(T0 \* = Time 0 control. no LPS; C0 \*\* = 24h control no LPS)

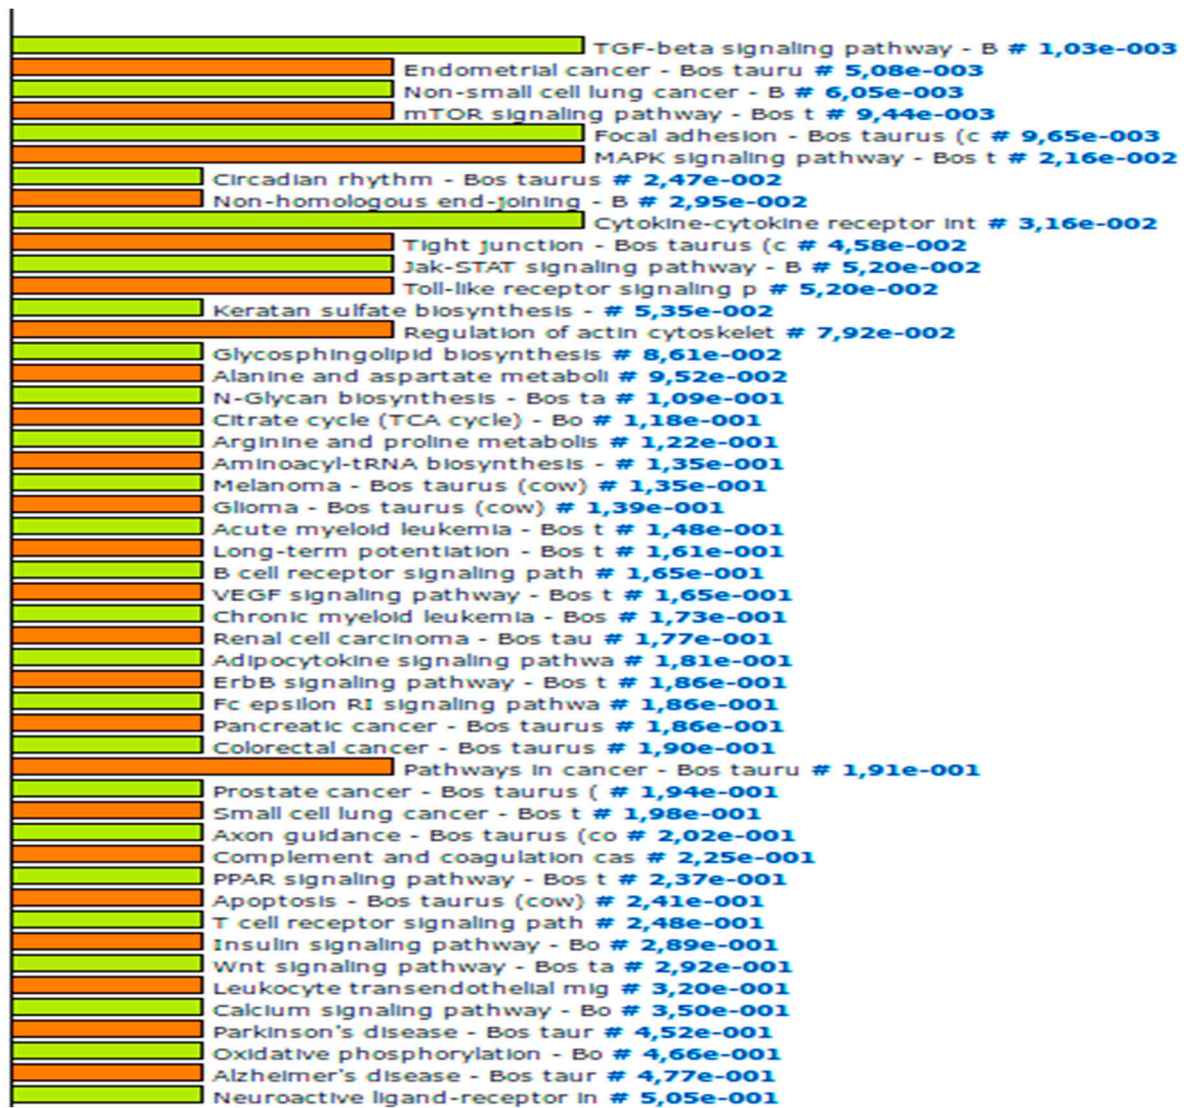

Figure S2: Biological pathways analysis of all DEGs in Gene browser platform. The graph displays the term name and the p-value (blue numbers). The length of the bars shows the number of genes that are involved in each pathway.
